# Supplementary material
Source: Springer Nature journal article supplement (https://www.springermedizin.de/resource/supplementary/13054_2014_2562_MOESM2_ESM.pdf/9714210)
Supplement: MOESM2 [file 9714210]

Patients  
n = 163

Mild  
n = 103

Moderately  
severe  
n = 35

Severe  
n = 25

MMS < 2  
n = 103

MMS  $\geq$  2  
n = 0

MMS < 2  
n = 25

MMS  $\geq$  2  
n = 10

MMS < 2  
n = 14

MMS  $\geq$  2  
n = 11
